# Supplementary material for: New‐Onset Atrial Fibrillation After Coronary Artery Bypass Grafting and Long‐Term Outcome: A Population‐Based Nationwide Study From the SWEDEHEART Registry
Source: PubMed Central journal article supplement — J Am Heart Assoc. 2020 Nov 30;10(1):e017966. doi: 10.1161/JAHA.120.017966 (PMC7955471; doi:10.1161/jaha.120.017966), 2020-11-30
Supplement: JAH3-10-e017966-s001.pdf [file JAH3-10-e017966-s001.pdf]

# **Supplemental Material**

**Table S1. List of diagnoses according to ICD-10.**

| <b>Variable</b>                     | <b>ICD-codes</b>                                                                                                                                                                     |
|-------------------------------------|--------------------------------------------------------------------------------------------------------------------------------------------------------------------------------------|
| <b>Intracranial bleedning</b>       | I60, I61, I62, I690, I691, I692                                                                                                                                                      |
| <b>Gastrointestinal bleedning</b>   | I850, I983, K226, K250, K252, K254, K256, K260, K262, K264, K266, K270, K272, K274, K276, K280, K284, K290, K625, K661, K920, K921, K922, K25, K26, K27, K28, I850, I983, K221, K226 |
| <b>Hemopericardium</b>              | I230, I312                                                                                                                                                                           |
| <b>Hemothorax</b>                   | J942                                                                                                                                                                                 |
| <b>Urogenital bleedning</b>         | N02, R319, N95, N939, N501A                                                                                                                                                          |
| <b>Other bleedning</b>              | H431, R04, R58, D629, T810, DR029, D50                                                                                                                                               |
| <b>Anemia</b>                       | D50-64                                                                                                                                                                               |
| <b>Atrial fibrillation</b>          | I48                                                                                                                                                                                  |
| <b>Ischemic stroke</b>              | I63, I69.3, I69.4                                                                                                                                                                    |
| <b>Stroke unspecified</b>           | I64                                                                                                                                                                                  |
| <b>TIA</b>                          | G45, I66, I65                                                                                                                                                                        |
| <b>Peripheral arterial embolism</b> | I74                                                                                                                                                                                  |
| <b>Heart failure</b>                | I50, I110, I130, I132, I255, I42-43                                                                                                                                                  |
| <b>Hypertension</b>                 | I10-15                                                                                                                                                                               |
| <b>Diabetes mellitus</b>            | E10-14                                                                                                                                                                               |
| <b>Ischemic heart disease</b>       | I20, I24, I25                                                                                                                                                                        |
| <b>Myocardial infarction</b>        | I21, I22                                                                                                                                                                             |
| <b>PCI</b>                          | FNG                                                                                                                                                                                  |
| <b>Peripheral vascular disease</b>  | I70, I71, I72, I73, I74, I77                                                                                                                                                         |
| <b>Vascular disease</b>             | I21, I22, I252, I70-73                                                                                                                                                               |
| <b>Renal disease and RRT</b>        | N17-19, DR016, DR024, KAS10, KAS20                                                                                                                                                   |
| <b>Liver disease</b>                | K70-77, JJB, JJC                                                                                                                                                                     |
| <b>Alcohol</b>                      | E244, F10, G312, G621, G721, I426, K292, K70, K860, O354, P043, Q860, T51, Y90-91, Z502, Z714                                                                                        |
| <b>COPD</b>                         | J44                                                                                                                                                                                  |
| <b>Pulmonary embolism</b>           | I26                                                                                                                                                                                  |
| <b>DVT</b>                          | I80                                                                                                                                                                                  |

COPD: Chronic obstructive pulmonary disease; DVT: Deep vein thrombosis; ICD-10: International classification of diseases 10<sup>th</sup> version; PCI: Percutaneous coronary intervention; TIA: Transitory ischemic attack

**Table S2. List of medications according to ATC.**

| <b>Medication</b>                                | <b>ATC-codes</b>        |
|--------------------------------------------------|-------------------------|
| <b>Renin-angiotensin inhibitors</b>              | C09                     |
| <b>Betablockers</b>                              | C09 (excluding C07AA07) |
| <b>Mineralocorticoid receptor antagonists</b>    | C03DA                   |
| <b>Calcium antagonists</b>                       | C08                     |
| <b>Oral anticoagulants</b>                       | B01AA, B01AE, B01AF     |
| <b>Antiplatelets</b>                             | B01AC, N02bA            |
| <b>Lipid lowering agents</b>                     | C10                     |
| <b>Antidiabetics</b>                             | A10                     |
| <b>Systemic corticosteroids</b>                  | H02                     |
| <b>Antiinflammatory and antirheumatic agents</b> | M01                     |
| <b>Diuretics</b>                                 | C03 (excludning C03DA)  |
| <b>Antiarrhythmic drugs</b>                      | C01B, C07AA07           |
| <b>Digoxin</b>                                   | C01AA05                 |

ATC: The Anatomical Therapeutic Classification

**Table S3. Variables included in the propensity score adjusted analysis.**

1. Sex
2. Age
3. Year of cardiac surgery
4. Body mass index
5. History of myocardial infarction
6. History of unstable angina
7. History of stable angina
8. Previous Percutaneous coronary intervention
9. History of diabetes mellitus
10. History of hypertension
11. History of chronic respiratory disease
12. History of peripheral arterial disease
13. History of cancer
14. History of chronic renal failure
15. History of renal replacement therapy
16. History of heart failure
17. Left ventricular ejection fraction
18. History of unspecified stroke
19. History of ischemic stroke
20. History of hemorrhagic stroke
21. History of transitory ischemic attack
22. History of liver disease
23. History of liver operation
24. History of pulmonary embolism
25. History of deep vein thrombosis
26. History of peripheral arterial embolism
27. History of intracranial bleeding
28. History of gastrointestinal bleeding
29. History of anemia
30. History of pericardial bleeding
31. History of pulmonary bleeding
32. CHA<sub>2</sub>DS<sub>2</sub>-VASc score
33. Treatment with diuretics
34. Treatment with Mineralocorticoid receptor antagonists
35. Treatment with Beta-blockers
36. Treatment with Angiotensin-converting enzyme inhibitors
37. Treatment with Angiotensin receptor blockers
38. Treatment with Calcium channel blockers
39. Treatment with Lipid lowering agents
40. Treatment with Antiplatelets
41. Treatment with Oral anticoagulants
42. Treatment with Corticosteroids
43. Treatment with Non-steroidal anti-inflammatory drugs
44. Treatment with Antiarrhythmic agents
45. Treatment with Insulin and Antidiabetic agents

**Figure S1. SMD before and after weighting.**

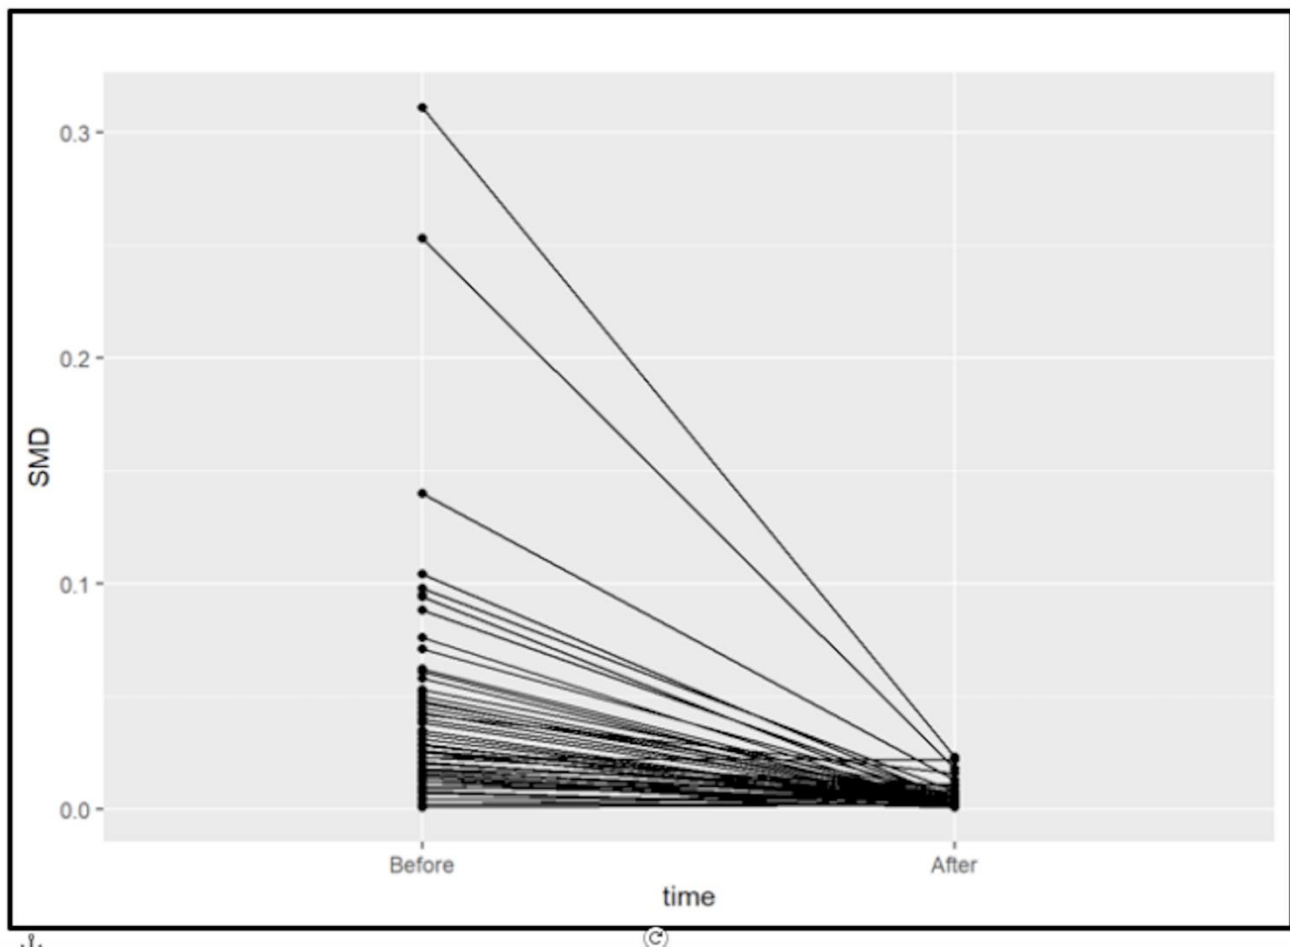

SMD: standardized mean difference.
